# Supplementary material for: Deep Sequencing and Screening of Differentially Expressed MicroRNAs Related to Milk Fat Metabolism in Bovine Primary Mammary Epithelial Cells
Source: MDPI journal article supplement (doi:10.3390/ijms17020200), 2016-02-17
Supplement: s1 [file s1]

# Supplementary Materials: Deep Sequencing and Screening of Differentially Expressed microRNAs Related to Milk Fat Metabolism in Bovine Primary Mammary Epithelial Cells

Binglei Shen, Liying Zhang, Chuanjiang Lian, Chunyan Lu, Yonghong Zhang, Qiqi Pan, Runjun Yang and Zhihui Zhao

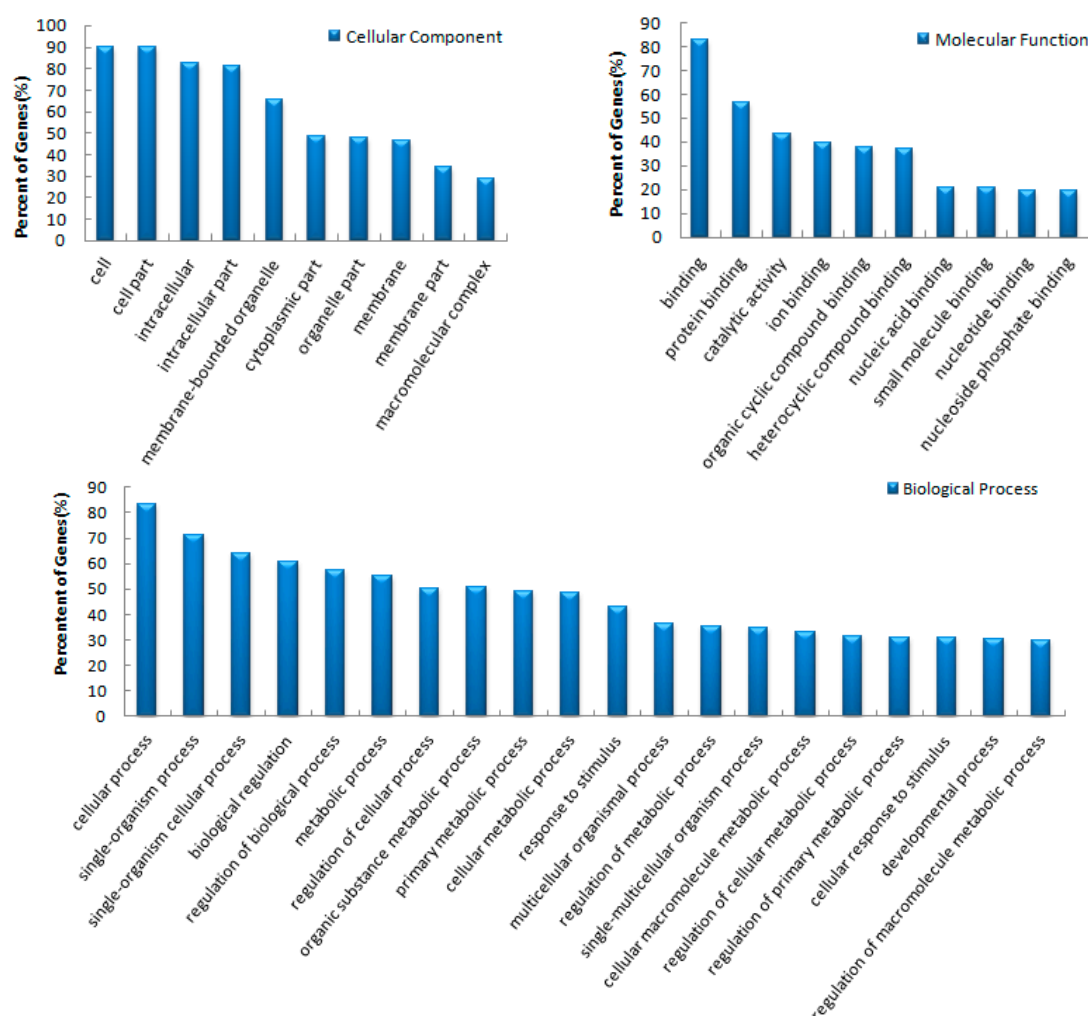

**Figure S1.** GO analyses of predicted targets of differentially expressed miRNAs. The top twenty categories enriched in biological processes and top ten categories enriched in both the cellular components and molecular functions.

**Table S8.** Six screened miRNAs whose target gene candidates were annotated to the pathway related to fatty acid metabolism.

| Gene Symbol                                 | Gene Description                                             |
|---------------------------------------------|--------------------------------------------------------------|
| bta-miR-33a                                 |                                                              |
| Unsaturated fatty acid biosynthetic process |                                                              |
| <i>ELOVL5</i>                               | ELOVL family member 5                                        |
| <i>ALOX15</i>                               | arachidonate 15-lipoxygenase                                 |
| <i>ELOVL 6</i>                              | hypothetical LOC533333                                       |
| <i>SC4MOL</i>                               | sterol-C4-methyl oxidase-like                                |
| bta-miR-21*                                 |                                                              |
| Unsaturated fatty acid biosynthetic process |                                                              |
| <i>CD74</i>                                 | CD74 molecule                                                |
| <i>PTGIS</i>                                | prostaglandin I2 (prostacyclin) synthase                     |
| <i>PTGS1</i>                                | prostaglandin-endoperoxide synthase 1                        |
| <i>SYK</i>                                  | spleen tyrosine kinase                                       |
| Fatty acid biosynthetic process             |                                                              |
| <i>PTGIS</i>                                | prostaglandin I2 (prostacyclin) synthase                     |
| <i>PTGS1</i>                                | prostaglandin-endoperoxide synthase 1                        |
| <i>SYK</i>                                  | spleen tyrosine kinase                                       |
| Fatty acid metabolic process                |                                                              |
| <i>ADIPOQ</i>                               | adiponectin, C1Q and collagen domain containing              |
| <i>CPT1</i>                                 | carnitine palmitoyltransferase 1B (muscle)                   |
| bta-miR-152                                 |                                                              |
| Fatty acid biosynthetic process             |                                                              |
| <i>PTGS2</i>                                | prostaglandin-endoperoxide synthase 2                        |
| <i>PRKAG3</i>                               | protein kinase, AMP-activated, gamma 3 non-catalytic subunit |
| <i>QKI</i>                                  | quaking homolog, KH domain RNA binding                       |
| <i>SC5DL</i>                                | sterol-C5-desaturase-like                                    |
| Fatty acid metabolic process                |                                                              |
| <i>PRKAA1</i>                               | protein kinase, AMP-activated, alpha 1 catalytic subunit     |
| <i>UCP3</i>                                 | uncoupling protein 3 (mitochondrial, proton carrier)         |
| bta-miR-224                                 |                                                              |
| Unsaturated fatty acid biosynthetic process |                                                              |
| <i>ALOX15</i>                               | arachidonate 5-lipoxygenase-activating protein               |
| <i>GST</i>                                  | microsomal glutathione S-transferase 2                       |
| <i>PTGS1</i>                                | prostaglandin-endoperoxide synthase 1                        |
| Fatty acid biosynthetic process             |                                                              |
| <i>ELOVL 5</i>                              | ELOVL family member 5, elongation of long chain fatty acids  |
| <i>ALOX15</i>                               | arachidonate5-lipoxygenase-activating protein                |
| <i>LPL</i>                                  | lipoprotein lipase                                           |
| <i>GST</i>                                  | microsomal glutathione S-transferase 2                       |
| <i>PTGS1</i>                                | prostaglandin-endoperoxide synthase 1                        |
| bta-miR-877                                 |                                                              |
| Unsaturated fatty acid biosynthesis process |                                                              |
| <i>EDN1</i>                                 | endothelin 1                                                 |
| <i>HPGD</i>                                 | hydroxyprostaglandin dehydrogenase 15-(NAD)                  |
| <i>PDPN</i>                                 | podoplanin                                                   |
| <i>PTGIS</i>                                | prostaglandin I2 (prostacyclin) synthase                     |

Table S8. Cont.

| Gene Symbol                     | Gene Description                                             |
|---------------------------------|--------------------------------------------------------------|
| Fatty acid metabolic process    |                                                              |
| <i>EDN1</i>                     | endothelin 1                                                 |
| <i>HADHB</i>                    | hydroxyacyl-Coenzyme A dehydrogenase beta subunit            |
| <i>PDPN</i>                     | podoplanin                                                   |
| <i>PTGIS</i>                    | prostaglandin I2 (prostacyclin) synthase                     |
| <i>PRKAG1</i>                   | protein kinase, AMP-activated, gamma 1 non-catalytic subunit |
| bta-miR-29b                     |                                                              |
| Fatty acid biosynthetic process |                                                              |
| <i>LPL</i>                      | lipoprotein lipase                                           |
| <i>PLP</i>                      | proteolipid protein RG Bos taurus                            |

bta-miR-21\*, sequence is from the opposite arm of bta-miR-21.

Table S10. Primer sequences of candidate target genes for qRT-qPCR.

| Gene Name      | Primer Sequence (5'-3')                              | Size (bp) | Annealing Temperature (°C) |
|----------------|------------------------------------------------------|-----------|----------------------------|
| <i>ELOVL5</i>  | F: GTGGAGGAGAAGCGGACA<br>R: TTGCGGAGGATGAAGAAGA      | 100       | 60                         |
| <i>ALOX15</i>  | F: TGGACTGGCCCTACGAATAC<br>R: GATGGAAGTTGGGAAGAGGA   | 124       | 60                         |
| <i>ELOVL6</i>  | F: CCTCCATCTCAAAGGACTGC<br>R: GGCCTTCTCTCTACCTCTGG   | 101       | 60                         |
| <i>SC4MOL</i>  | F: CTGGGTGACTGTTTCGTTTGA<br>R: ATGTGGTGGAAATCGTGATG  | 120       | 60                         |
| <i>PTGS2</i>   | F: GGGCGATGAGCAGTTGTT<br>R: GCAGCAATACGGTTCTGGTA     | 168       | 60                         |
| <i>PRKAG3</i>  | F: CTCCGCTTCTGGATTACCTG<br>R: GTGACAAAGTCGGGAGGAAC   | 101       | 60                         |
| <i>QKI</i>     | F: GAACTCCTCACCCCTACTGCTG<br>R: TAGCCACCGCACCTAATACA | 150       | 60                         |
| <i>SC5DL</i>   | F: TGAAGATCCCAACTCCATT<br>R: AAGCCCAGGATGCTTGTGT     | 118       | 60                         |
| <i>PRKAA1</i>  | F: CGCCATACCCTTGATGAATTA<br>R: ATCATTGGCCGACTTGAC    | 102       | 60                         |
| <i>UCP3</i>    | F: CACCTGCTCACCGACAAC<br>R: CATATACCGCGTCTTCACCA     | 175       | 60                         |
| <i>ALOX5AP</i> | F: ACGAAAGCAAGACCCACAAT<br>R: TACATCAGCCCAGCAAAGG    | 165       | 60                         |
| <i>GST</i>     | F: GGACAGATGACAGGGTGGA<br>R: TCGTGTGGTAGATTCGTGCT    | 142       | 60                         |
| <i>PTGS1</i>   | F: GTGCCATCCGAACTCCAT<br>R: AAGGTTGAAGCCACATCAC      | 100       | 60                         |
| <i>LPL</i>     | F: AACTTGCCACCTCATTCCT<br>R: TACATTCCTGTCACCGTCCA    | 124       | 60                         |
| <i>EDN1</i>    | F: CTGGACATCATCTGGGTCAA<br>R: GGCATCTCTTCTGTGGACT    | 101       | 60                         |

Table S10. Cont.

| Gene Name     | Primer Sequence (5'-3')                                       | Size (bp) | Annealing Temperature (°C) |
|---------------|---------------------------------------------------------------|-----------|----------------------------|
| <i>HADHB</i>  | F: TCAACACTCCAGAGCACGTT<br>R: CACACTGGCATCTCTTCCTG            | 127       | 60                         |
| <i>HPGD</i>   | F: AACCTACCTGGGCTTGGATT<br>R: GCGTTCAGTCTCACACCACT            | 117       | 60                         |
| <i>PDPN</i>   | F: TCAGAAAGGTGGCTTGTCAG<br>R: AGGGCGAGTATCTTCCCATT            | 198       | 60                         |
| <i>PTGIS</i>  | F: CAAAGATGGGAAGCGACTG<br>R: GTCAGCACAAGGAACACGAA             | 122       | 60                         |
| <i>PRKAG1</i> | F: ATCCAGCCTTTGCCTCTGT<br>R: GGACTCAGCCTCCTCCATAC             | 117       | 60                         |
| <i>CD74</i>   | F: ATGAAGAACGCCACCAAGTA<br>R: TTCCAGTCCAAGCCATCC              | 114       | 60                         |
| <i>SYK</i>    | F: CTGGACCCTTTGAGGACTTG<br>R: CTGAGGTTTCTGGCTGATGA            | 155       | 60                         |
| <i>ADIPOQ</i> | F: AGGGAGAACCTGGAGAAAAGTG<br>R: TTGGTAAAGCGAATGGGAAC          | 110       | 60                         |
| <i>CPT1</i>   | F: ACCTGAACGAAGACCTCCAA<br>R: CCACCATGCAAGTTCAGG              | 100       | 60                         |
| <i>PLP</i>    | F: TTCCTGAACGAAGATTCACAA<br>R: AGCTTCGGAAGCAATCGGA            | 112       | 60                         |
| <i>GAPDH</i>  | F: CGTGTCTGTTGTAGGATCTGACCTGC<br>R: CAACCTGGTCCTCTAGTGTAGCCTT | 176       | 58                         |
